# Supplementary material for: Linezolid use in German acute care hospitals: results from two consecutive national point prevalence surveys
Source: PubMed Central journal article supplement (PMC6805522; doi:10.1186/s13756-019-0617-0), 2019-10-21
Supplement: 13756_2019_617_MOESM1_ESM.pdf [file 13756_2019_617_MOESM1_ESM.pdf]

1 **Table S1** Healthcare-associated infections as defined by the European Centre for Disease Prevention  
2 and Control and causing pathogens in patients receiving linezolid. Data from the national point  
3 prevalence surveys 2011 and 2016. Data comparison of the two surveys  
4

| Healthcare-associated infection             | Variable/Pathogen                         | Number<br>PPS 2011   | PPS 2016 | p-value |
|---------------------------------------------|-------------------------------------------|----------------------|----------|---------|
| All                                         | Number of infections                      | 67                   | 129      | n.a.    |
|                                             | All isolated pathogens                    | 75                   | 132      |         |
|                                             | <i>Staphylococcus aureus</i> (MRSA)       | 14 (9)               | 19 (12)  |         |
|                                             | <i>Enterococcus</i> spp. (VRE)            | 16 (4)               | 44 (10)  |         |
|                                             | Coagulase-negative staphylococci          | 10                   | 21       |         |
|                                             | <i>Enterobacter</i> spp.                  | 6                    | 6        |         |
|                                             | <i>Escherichia coli</i>                   | 7                    | 12       |         |
|                                             | <i>Klebsiella</i> spp.                    | 5                    | 6        |         |
|                                             | <i>Pseudomonas aeruginosa</i>             | 3                    | 9        |         |
|                                             | Other                                     | 14                   | 15       |         |
|                                             | Bloodstream infection                     | Number of infections | 9        |         |
| All isolated pathogens                      |                                           | 11                   | 28       |         |
| <i>Staphylococcus aureus</i> (MRSA)         |                                           | 2 (1)                | 6 (4)    |         |
| <i>Enterococcus</i> spp. (VRE)              |                                           | 3 (0)                | 8 (2)    |         |
| Coagulase-negative staphylococci            |                                           | 3                    | 7        |         |
| <i>Enterobacter</i> spp.                    |                                           | 0                    | 0        |         |
| <i>Escherichia coli</i>                     |                                           | 2                    | 2        |         |
| <i>Klebsiella</i> spp.                      |                                           | 0                    | 1        |         |
| <i>Pseudomonas aeruginosa</i>               |                                           | 0                    | 2        |         |
| Other                                       |                                           | 1                    | 2        |         |
| Non-laboratory confirmed systemic infection |                                           | Number of infections | 5        | 6       |
| Lower respiratory tract infection           | Number of infections                      | 19                   | 32       | n.a.    |
|                                             | All isolated pathogens                    | 21                   | 25       |         |
|                                             | <i>Staphylococcus aureus</i> (MRSA)       | 5 (4)                | 8 (5)    |         |
|                                             | <i>Enterococcus</i> spp. (VRE)            | 2 (1)                | 3 (0)    |         |
|                                             | Coagulase-negative staphylococci          | 1                    | 2        |         |
|                                             | <i>Enterobacter</i> spp.                  | 2                    | 4        |         |
|                                             | <i>Escherichia coli</i>                   | 0                    | 1        |         |
|                                             | <i>Klebsiella</i> spp.                    | 2                    | 3        |         |
|                                             | <i>Pseudomonas aeruginosa</i>             | 3                    | 1        |         |
|                                             | Other                                     | 6                    | 3        |         |
|                                             | Surgical site infection                   | Number of infections | 20       |         |
| All isolated pathogens                      |                                           | 30                   | 42       |         |
| <i>Staphylococcus aureus</i> (MRSA)         |                                           | 4 (3)                | 2 (1)    |         |
| <i>Enterococcus</i> spp. (VRE)              |                                           | 7 (3)                | 20 (5)   |         |
| Coagulase-negative staphylococci            |                                           | 4                    | 6        |         |
| <i>Enterobacter</i> spp.                    |                                           | 4                    | 2        |         |
| <i>Escherichia coli</i>                     |                                           | 5                    | 5        |         |
| <i>Klebsiella</i> spp.                      |                                           | 3                    | 0        |         |
| <i>Pseudomonas aeruginosa</i>               |                                           | 0                    | 3        |         |
| Other                                       |                                           | 3                    | 4        |         |
| Urinary tract infection                     |                                           | Number of infections | 4        | 11      |
|                                             | All isolated pathogens                    | 4                    | 6        |         |
|                                             | <i>Staphylococcus aureus</i> (MRSA)       | 0                    | 0        |         |
|                                             | <i>Enterococcus</i> spp. (VRE)            | 2 (0)                | 4 (1)    |         |
|                                             | Coagulase-negative staphylococci          | 0                    | 0        |         |
|                                             | <i>Enterobacter</i> spp.                  | 0                    | 0        |         |
|                                             | <i>Escherichia coli</i>                   | 0                    | 0        |         |
|                                             | <i>Klebsiella</i> spp.                    | 0                    | 1        |         |
|                                             | <i>Pseudomonas aeruginosa</i>             | 0                    | 0        |         |
|                                             | Other                                     | 2                    | 1        |         |
|                                             | <i>Clostridioides difficile</i> infection | Number of infections | 2        | 4       |
| Other/Not specified                         | Number of infections                      | 8                    | 23       | n.a.    |

5 Except where specified otherwise, p-values were calculated using Chi-squared test. Abbreviations: PPS point prevalence  
6 survey; MRSA methicillin-resistant *Staphylococcus aureus*; VRE vancomycin-resistant enterococci; (a) p-values were  
7 calculated for all listed pathogens collectively using R by C tables

8 **Table S2** Structural and process parameters of antimicrobial use and antimicrobial stewardship of  
 9 218 hospitals that participated in the point prevalence survey 2016

| Variable                                                     | Group/Parameter                                                                            | Number (percentage) or Median (interquartile range) |                                         |                                     | p-value          |
|--------------------------------------------------------------|--------------------------------------------------------------------------------------------|-----------------------------------------------------|-----------------------------------------|-------------------------------------|------------------|
|                                                              |                                                                                            | All hospitals (n=218)                               | Hospitals without linezolid use (n=123) | Hospitals with linezolid use (n=95) |                  |
| Microbiological diagnostics                                  | Number of blood cultures per 100 patient-days                                              | 2.1 (1.3-3.1)                                       | 1.7 (0.9-2.6)*                          | 2.5 (1.8-3.5)*                      | <b>&lt;0.01*</b> |
|                                                              | Number of stool samples for <i>Clostridioides difficile</i> infection per 100 patient-days | 0.7 (0.5-1.1)                                       | 0.6 (0.2-1.1)*                          | 0.8 (0.6-1.1)*                      | <b>0.01*</b>     |
| Surveillance (regional or national network)                  | <i>Clostridioides difficile</i> infection                                                  | 119 (54.6)                                          | 64 (52.0)                               | 55 (57.9)                           | 0.39             |
|                                                              | Antimicrobial consumption                                                                  | 83 (38.1)                                           | 45 (36.6)                               | 38 (40)                             | 0.60             |
|                                                              | Antimicrobial resistance                                                                   | 56 (25.7)                                           | 35 (28.5)                               | 21 (22.1)                           | 0.29             |
| Componentes of multimodal strategies (at the hospital level) | Guideline for antimicrobial use                                                            | 157 (72.0)                                          | 90 (73.2)                               | 67 (70.5)                           | 0.67             |
|                                                              | Training for antimicrobial use                                                             | 37 (17.0)                                           | 19 (15.4)                               | 18 (18.9)                           | 0.50             |
|                                                              | Bundle for antimicrobial use                                                               | 136 (62.4)                                          | 86 (69.9)                               | 50 (52.6)                           | <b>&lt;0.01</b>  |
|                                                              | Checklist for antimicrobial use                                                            | 25 (11.5)                                           | 18 (14.6)                               | 7 (7.4)                             | 0.10             |
|                                                              | Audit for antimicrobial use                                                                | 74 (33.9)                                           | 44 (35.8)                               | 30 (31.6)                           | 0.52             |
|                                                              | Surveillance of antimicrobial use                                                          | 145 (66.5)                                          | 84 (68.3)                               | 61 (64.2)                           | 0.53             |
|                                                              | Feedback of data on antimicrobial use                                                      | 150 (64.2)                                          | 82 (66.7)                               | 58 (61.1)                           | 0.40             |
| Post-prescription review of antimicrobials within 72 hours   | Percentage of hospital beds                                                                | 0 (0-16.8)                                          | 0 (0-22.4)*                             | 0 (0-15.1)*                         | 0.29*            |
| Designated staff for antimicrobial stewardship               | Hospital with designated staff for antimicrobial stewardship                               | 61 (28.0)                                           | 35 (28.5)                               | 26 (27.4)                           | 0.86             |
|                                                              | Fulltime equivalents per hospital                                                          | 0 (0-0.1)                                           | 0 (0-0.1)*                              | 0 (0-0.2) *                         | <b>0.80*</b>     |
|                                                              | Fulltime equivalents per 250 beds                                                          | 0 (0-0.1)                                           | 0 (0-0.1)*                              | 0 (0-0.1)*                          | <b>0.58*</b>     |

10 Where necessary, asterisks are used to indicate the datasets relating to a p-value. P-values for variables where median and  
 11 interquartile range are stated, were calculated with Mann–Whitney U test. P-values for variables where number and  
 12 percentage are stated, were calculated with Chi-squared test. Bold print is used to indicate statistical significance.

13 **Table S3** Antimicrobial use in German acute care hospitals. Data from the national point prevalence  
 14 surveys 2011 and 2016 of the core group participating in both surveys. Data comparison of the two  
 15 surveys

| Parameter               | Group                                             | Variable                              | Number (percentage) or Median (IQR) |                             |                      |                             | p-value                             |       |
|-------------------------|---------------------------------------------------|---------------------------------------|-------------------------------------|-----------------------------|----------------------|-----------------------------|-------------------------------------|-------|
|                         |                                                   |                                       | Total PPS 2011                      | With linezolid use PPS 2011 | Total PPS 2016       | With linezolid use PPS 2016 |                                     |       |
| Participating hospitals | Total                                             |                                       | 46 (100)                            | 19 (41.3)                   | 46 (100)             | 22 (47.8)                   | 0.54                                |       |
|                         | Number of hospital beds                           | Median (IQR)                          | 368<br>(261-674)*                   | 666<br>(434-785)**          | 392<br>(229-639)*    | 578<br>(383-794)**          | 0.86*;<br>0.31**                    |       |
|                         | Prevalence of patients with antimicrobial use     | Median (IQR)                          | 28.0<br>(20.9-31.8)*                | 29.9<br>(26.4-31.7)**       | 26.5<br>(20.0-31.3)* | 28.6<br>(20.0-35.9)**       | 0.82*;<br>0.92**                    |       |
|                         | Region                                            | West                                  |                                     | 16 (100)                    | 4 (25)               | 16 (100)                    | 3 (18.8)                            | 0.70  |
|                         |                                                   | North                                 |                                     | 6 (100)                     | 1 (16.7)             | 6 (100)                     | 4 (66.7)                            | 0.13  |
|                         |                                                   | Southwest                             |                                     | 8 (100)                     | 4 (50)               | 8 (100)                     | 6 (75)                              | 0.36  |
|                         |                                                   | Southeast                             |                                     | 9 (100)                     | 5 (55.6)             | 9 (100)                     | 4 (44.4)                            | 0.67  |
|                         |                                                   | East                                  |                                     | 7 (100)                     | 5 (71.4)             | 7 (100)                     | 5 (71.4)                            | >0.99 |
|                         | Hospital type                                     | Primary care                          |                                     | 23 (100)                    | 3 (13.0)             | 21 (100)                    | 6 (28.6)                            | 0.23  |
|                         |                                                   | Secondary care                        |                                     | 14 (100)                    | 9 (64.3)             | 12 (100)                    | 8 (66.7)                            | 0.91  |
|                         |                                                   | Tertiary care                         |                                     | 8 (100)                     | 7 (87.5)             | 10 (100)                    | 8 (80)                              | 0.74  |
|                         |                                                   | Specialized hospital                  |                                     | 1 (100)                     | 0 (0)                | 3 (100)                     | 0 (0)                               | n.a.  |
|                         | Hospital ownership                                | Public                                |                                     | n.a.                        | n.a.                 | 21                          | 12 (57.1)                           | n.a.  |
|                         |                                                   | Private, not for profit               |                                     | n.a.                        | n.a.                 | 10                          | 3 (30)                              | n.a.  |
| Private, for profit     |                                                   |                                       | n.a.                                | n.a.                        | 8                    | 4 (50)                      | n.a.                                |       |
| Other/Unknown           |                                                   |                                       | n.a.                                | n.a.                        | 7                    | 3 (42.9)                    | n.a.                                |       |
| Participating wards     | Total                                             |                                       | 890 (100)                           | 38 (4.3)                    | 868 (100)            | 50 (5.8)                    | 0.15                                |       |
|                         | Number of ward beds                               | Median (IQR)                          | 26<br>(17-33)*                      | 20<br>(14-36)**             | 26<br>(18-34)*       | 24<br>(16-32)**             | <b>0.01*</b> ;<br>0.08**            |       |
|                         | Prevalence of patients with antimicrobial use     | Median (IQR)                          | 23.7<br>(10.0-39.2)*                | 52.2<br>(33.1-72.5)**       | 25.0<br>(12.0-42.3)* | 48.8<br>(38.3-74.0)**       | <b>0.04*</b> ;<br><b>0.05**</b>     |       |
|                         | Percentage of antimicrobials with reason in notes | Median (IQR)                          | 92.3<br>(50.0-100)*                 | 88.6<br>(61.1-100)**        | 83.3<br>(40.0-100)*  | 87.0<br>(34.6-100)          | <b>&lt;0.01*</b> ;<br><b>0.01**</b> |       |
|                         | Percentage of linezolid among all antimicrobials  | Median (IQR)                          | 0.0<br>(0.0-0.0)*                   | 9.1<br>(7.1-14.3)**         | 0.0<br>(0.0-0.0)*    | 7.8<br>(6.2-14.3)**         | <b>&lt;0.01*</b> ;<br>0.82**        |       |
|                         | Ward specialty                                    | Medical (incl. geriatrics, neurology) |                                     | 277 (100)                   | 8 (2.9)              | 298 (100)                   | 13 (4.4)                            | 0.36  |
|                         |                                                   | Surgical (incl. G/O, urology, ENT)    |                                     | 311 (100)                   | 12 (3.9)             | 277 (100)                   | 14 (5.1)                            | 0.49  |
|                         |                                                   | ICU                                   |                                     | 88 (100)                    | 16 (18.2)            | 90 (100)                    | 21 (23.3)                           | 0.41  |
|                         |                                                   | Other/Not specified                   |                                     | 214 (100)                   | 2 (0.9)              | 203 (100)                   | 2 (1.0)                             | 0.96  |
|                         |                                                   | Region                                |                                     | 249 (100)                   | 9 (3.6)              | 233 (100)                   | 6 (2.6)                             | 0.53  |
|                         | Region                                            | North                                 |                                     | 99 (100)                    | 1 (1.0)              | 115 (100)                   | 6 (5.2)                             | 0.10  |
| Southwest               |                                                   |                                       | 181 (100)                           | 6 (3.3)                     | 162 (100)            | 14 (8.6)                    | <b>0.04</b>                         |       |
| Southeast               |                                                   |                                       | 111 (100)                           | 7 (6.3)                     | 119 (100)            | 6 (5.0)                     | 0.69                                |       |
| East                    |                                                   |                                       | 250 (100)                           | 15 (6)                      | 239 (100)            | 18 (7.5)                    | 0.51                                |       |
| Included patients       | Total                                             |                                       | 17009 (100)                         | 46 (0.3)                    | 17462 (100)          | 59 (0.3)                    | 0.26                                |       |
|                         | Patient specialty                                 | Medical (incl. geriatrics, neurology) |                                     | 6817 (100)                  | 12 (0.2)             | 7509 (100)                  | 12 (0.2)                            | 0.81  |
|                         |                                                   | Surgical (incl. G/O, urology, ENT)    |                                     | 7243 (100)                  | 17 (0.2)             | 7302 (100)                  | 30 (0.4)                            | 0.06  |
|                         |                                                   | Intensive care                        |                                     | 801 (100)                   | 17 (2.1)             | 774 (100)                   | 17 (2.2)                            | 0.92  |
| Other/Not specified     |                                                   |                                       | 2148 (100)                          | 0 (0)                       | 1877 (100)           | 0 (0)                       | n.a.                                |       |

16 Where more than one p-value per row is given, asterisks are used to indicate the corresponding datasets. P-values for  
 17 variables where median and interquartile range are stated, were calculated with Mann–Whitney U test. P-values for  
 18 variables where number and percentage are stated, were calculated with Chi-squared test. Bold print is used to indicate  
 19 statistical significance. Abbreviations: *IQR* interquartile range; *PPS* point prevalence survey; *West* North Rhine-Westphalia;  
 20 *North* Bremen, Hamburg, Lower Saxony, Mecklenburg-West Pomerania, Schleswig-Holstein; *Southwest* Baden-  
 21 Württemberg, Saarland, Rhineland-Palatinate; *Southeast* Bavaria, Hesse; *East* Berlin, Brandenburg, Saxony, Saxony-Anhalt,  
 22 Thuringia; *n.a.* not available/not applicable; *FTE* full-time equivalent; *G/O* gynecology and obstetrics; *ENT* otolaryngology;  
 23 *ICU* intensive care unit
